# Supplementary material for: Detection of PrPres in peripheral tissue in pigs with clinical disease induced by intracerebral challenge with sheep-passaged bovine spongiform encephalopathy agent
Source: PubMed Central journal article supplement (PMC6033439; doi:10.1371/journal.pone.0199914), 2018-07-05
Supplement: pone.0199914.s003.pdf [file pone.0199914.s003.pdf]

**S1 Table: Individual survival periods and detection limits of Western Blot and PMCA for brain samples of Sh-BSE inoculated pigs**

| Sh-BSE inoculated pigs | Survival time (mpi) <sup>a</sup> | Max. Dilution WB (brain) | Max. Dilution PMCA(brain) <sup>b</sup> |
|------------------------|----------------------------------|--------------------------|----------------------------------------|
| P1                     | 27                               | 10 <sup>-3</sup>         | 10 <sup>-9</sup>                       |
| P2                     | 30                               | 10 <sup>-1</sup>         | 10 <sup>-8</sup>                       |
| P3                     | 17                               | 10 <sup>-2</sup>         | 10 <sup>-9</sup>                       |
| P4                     | 26                               | 10 <sup>-2</sup>         | 10 <sup>-8</sup>                       |
| P5                     | 30                               | 10 <sup>-3</sup>         | 10 <sup>-9</sup>                       |

<sup>a</sup> Survival times are expressed as the number of months between inoculation and euthanasia. All inoculated animals developed clinical signs consistent with a TSE.

*mpi* Months postinoculation

<sup>b</sup> The detection limit of PMCA is expressed as the maximum dilution at which prion amplification was detected in brain samples after 3 rounds of PMCA
